# Supplementary material
Source: Springer Nature journal article supplement (https://www.springermedizin.de/resource/supplementary/12974_2008_172_MOESM3_ESM.pdf/9600958)

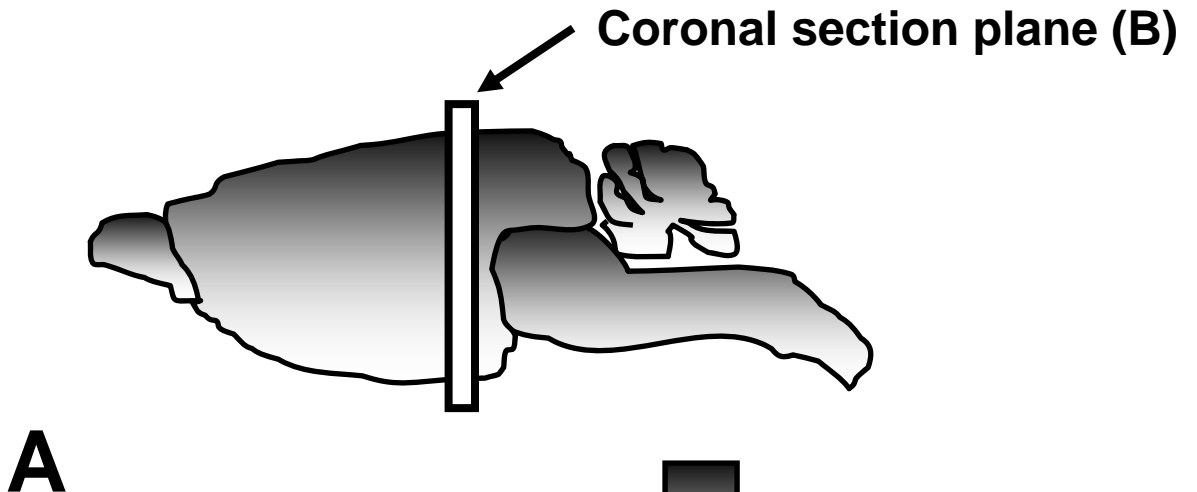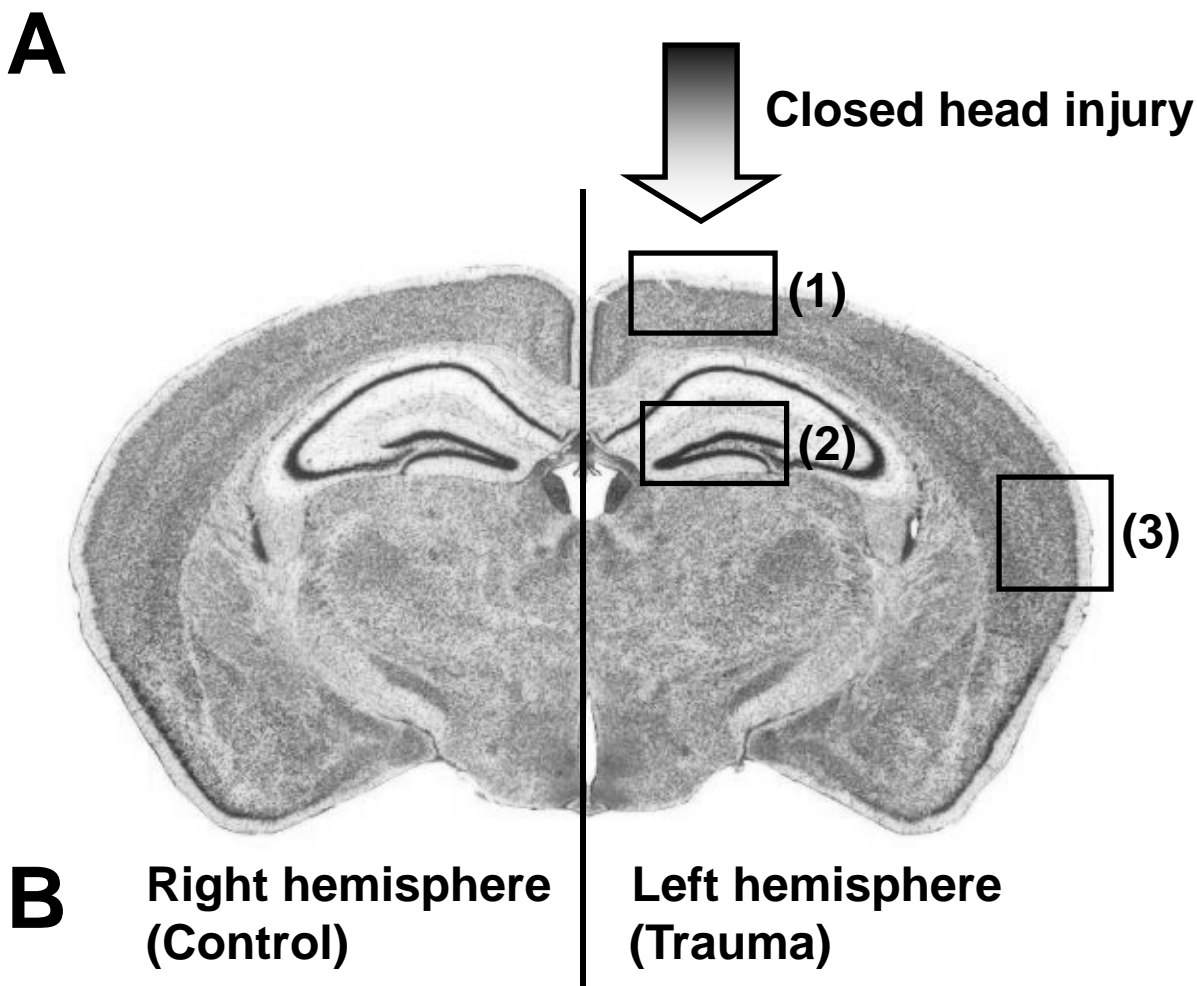

Supplement: MOESM3 [file 9600958]
